# Supplementary material
Source: PubMed Central journal article supplement (PMC3383803)
Supplement: NIHMS212562-supplement-01.pdf [file NIHMS212562-supplement-01.pdf]

**Table S1. T Cell Product Release Criteria**

| <b>Release Test</b>              | <b>Test Methodology</b>                                                                | <b>Criteria for Passing</b>                              |
|----------------------------------|----------------------------------------------------------------------------------------|----------------------------------------------------------|
| Plasmid vector copy number†      | Southern w/ NeoR-specific probe                                                        | Single band                                              |
| CAR expression                   | Western w/CD3ζ-specific antibody<br>Flow cytometry w/Fc-specific antibody              | Unique 66kDa band<br>Unimodal expression                 |
| Surface phenotype                | Flow cytometry                                                                         | ≥ 90% TCR-αβ and CD8†; or CD3‡                           |
| Anti-lymphoma cytolytic activity | 4-hr <sup>51</sup> Cr release assay                                                    | >50% specific lysis at E:T of 25:1                       |
| Viability                        | Trypan blue dye exclusion                                                              | >90% viability                                           |
| Sensitivity to ganciclovir‡      | 14-day culture, trypan blue dye exclusion                                              | ≤ 25% viability                                          |
| Antigen/IL-2 dependent growth    | <sup>3</sup> H-TdR uptake assay                                                        | <10% of Jurkat c.p.m.†; or positive control cell number‡ |
| Sterility                        | Bacterial and fungal growth media<br>Gen-Probe mycoplasma detection<br>Endotoxin ELISA | Negative cultures<br>Negative mycoplasma<br>< 5 EU/kg    |

†, IRB 98142 only

‡, IRB 01160 only

**Table S2. Patient attributes**

| IRB#  | UPN# | Diagnosis                   | Disease Burden<br>(at time of enrollment) | Prior<br>Rituximab | ALC <sup>†</sup><br>(cells/ $\mu$ L) | CD4/CD8 <sup>+</sup><br>T cells <sup>‡</sup> | CD19/CD20 <sup>+</sup> B cells |                   |
|-------|------|-----------------------------|-------------------------------------------|--------------------|--------------------------------------|----------------------------------------------|--------------------------------|-------------------|
|       |      |                             |                                           |                    |                                      |                                              | Pre <sup>‡</sup>               | Post <sup>*</sup> |
| 98142 | 006  | Diffuse large cell lymphoma | Limited lymph node involvement            | NO                 | 1,096                                | CD4: 61.9%<br>CD8: 16.0%                     | CD19: 0.43%<br>CD20: 0.65%     | 21.32%<br>19.27%  |
|       | 009  | Diffuse large cell lymphoma | Limited lymph node involvement            | YES                | 1,155                                | CD4: 53.3%<br>CD8: 42.8%                     | CD19: 2.58%<br>CD20: 8.24%     | 1.07%<br>1.37%    |
| 01160 | 035  | Follicular lymphoma         | Bulky disease                             | YES                | 1,663                                | CD4: 27.2%<br>CD8: 30.1%                     | CD19: 0.03%                    | 0.24%             |
|       | 037  | Follicular lymphoma         | Limited lymph node involvement            | YES                | 2,404                                | CD4: 35.1%<br>CD8: 28.8%                     | CD19: 0.24%                    | 0.08%             |

<sup>†</sup>, Absolute lymphocyte counts upon enrollment

<sup>‡</sup>, Percent of total peripheral blood mononuclear cells on day 0, prior to first infusion

<sup>\*</sup>, Percent of total peripheral blood mononuclear cells 14 days after final infusion

**Table S3. Absolute lymphocyte counts**

| IRB#   | UPN# | ALC (cells/ $\mu$ L)* |       |                |
|--------|------|-----------------------|-------|----------------|
|        |      | Enrollment            | Day 0 | Day 14         |
| 98142† | 006  | 1,096                 | 763   | 1,044 $\infty$ |
|        | 009  | 1,155                 | 850   | 1,049          |
| 01160‡ | 035  | 1,663                 | 1,505 | 1,188          |
|        | 037  | 2,404                 | 1,444 | 1,709          |

\*, Normal range = 600 – 4,950 cells/ $\mu$ L

†, Myeloablation and hematopoietic stem cell transplantation occurred between enrollment and day 0

‡, Fludarabine administration occurred between days 0 and 14

$\infty$ , ALC for UPN006 acquired at day 28 due to re-scheduled second infusion

## Supplemental Figure Legends

**Figure S1. Product Manufacturing Strategy.** (A) Plasmid vectors used to genetically redirect the patient's T cells to recognize CD20 (left) and CD19 (right). CD20- and CD19-specific CAR sequences (CD20R and CD19R) are indicated, as well as promoter (CMVp, EF-1p, SV40p), polyadenylation (BGHpolyA, SV40polyA), drug resistance (AmpR, NeoR, Hy), and origin of replication (ColE1ori, F1 ori) sequences. Note that the HyTK sequence is a fusion of the hygromycin resistance gene, and the HSV-1 thymidine kinase suicide gene. (B) Schematic of the CD20- and CD19-specific CAR molecules. Each has a murine single chain variable fragment (scFv) which makes it specific for either CD20 or CD19, a human IgG hinge-Fc (hu $\gamma$ Fc) domain, a human CD4 transmembrane (huCD4tm) domain, and a human CD3 $\zeta$  cytoplasmic (huCD3 $\zeta$ cyt) domain. (C) Product manufacturing schema of genetically modified T cells that target CD20 (left) and CD19 (right). Patient peripheral blood mononuclear cells were activated with the CD3 agonist OKT3 and rhuIL-2 for three days and then electroporated with linearized CD20R\_pcDNA3.1(-) (left) or CD19R\_HyTK-pMG (right). Cells were placed in drug selection conditions 2-3 days later. Cloning (for CD20R expressing products only) and expansion were carried out in the presence of OKT3, rhuIL-2, irradiated LCL and irradiated PBMC feeders. T-25, T-75 and T-150 refer to flask sizes that permit 25, 50 and 100 mL of culture media respectively. At certain steps, the target number of selected CD20-specific T cell clones that were to be generated are indicated in the schema on the left. Performance of tests for viability, sterility, the presence of mycoplasma or endotoxin, transgene copy number (Southern and PCR), total and surface CAR expression (via Western and flow cytometry), IL-2 dependence, and cytolytic activity against CD20- (left) or CD19- (right) expressing targets (Micro-CRA, CRA) are indicated.

**Figure S2. Protocol treatment schemas.** (A) Treatment schema for recurrent/refractory CD20<sup>+</sup> lymphoma using CD20R<sup>+</sup> autologous T cells. Autologous stem cell transplants were to be administered after a myeloablative preparative regimen of high dose chemotherapy with or without fractionated total body irradiation; administration of escalating T cell dose infusions at two week intervals would then began as early as 28 days later. (B) Treatment schema for CD19<sup>+</sup> follicular lymphoma using CD19R<sup>+</sup> HyTK<sup>+</sup> autologous T cells. Lymphodepleting fludarabine was to be administered i.v. at 25mg/m<sup>2</sup> x 5d; T cell supportive rhuIL-2 was to be administered s.c. at 5x10<sup>5</sup> IU/ m<sup>2</sup> BID for up to 5 days after infusions #3 and #4.
